# Supplementary material for: Probiotic Supplementation and Micronutrient Status in Healthy Subjects: A Systematic Review of Clinical Trials
Source: MDPI journal article supplement (doi:10.3390/nu13093001), 2021-08-28
Supplement: s1 [file s1]

**Figure S2. Bias assessment of non-randomized clinical trials. Green circles with plus sign = low risk of bias, blue circle with question mark= no information, red circle with cross sign = serious risk of bias.**

| Study | Author/ year           | Bias due to confounding                                                             | Bias due to selection of participants                                               | Bias in classification of interventions                                             | Bias due to deviations from intended interventions                                  | Bias due to missing data                                                             | Bias in measurement of outcomes                                                       | Bias in selection of the reported result                                              | Overall result                                                                        |
|-------|------------------------|-------------------------------------------------------------------------------------|-------------------------------------------------------------------------------------|-------------------------------------------------------------------------------------|-------------------------------------------------------------------------------------|--------------------------------------------------------------------------------------|---------------------------------------------------------------------------------------|---------------------------------------------------------------------------------------|---------------------------------------------------------------------------------------|
|       |                        |                                                                                     |                                                                                     |                                                                                     |                                                                                     |                                                                                      |                                                                                       |                                                                                       |                                                                                       |
|       | Elmadfa I et al., 2001 |   |   |   |   |   |   |   |   |
|       | Silva M et al., 2008   |  |  |  |  |  |  |  |  |
|       | Korčok D et al., 2018  |  |  |  |  |  |  |  |  |
