# Supplementary material for: Probiotic Supplementation and Micronutrient Status in Healthy Subjects: A Systematic Review of Clinical Trials
Source: MDPI journal article supplement (doi:10.3390/nu13093001), 2021-08-28
Supplement: s1 [file s1]

## Supplementary Documents:

**Figure S1. Bias assessment of parallel and cross-over RCTs. \* cross-over studies. Green circles with plus sign = low risk of bias, yellow circle with minus sign = some concerns.**

| Study | Author/ year                  | Bias arising from randomization process                                             | Bias due to deviation from intended intervention                                    | Bias due to missing outcome data                                                    | Bias in measurement of the outcome                                                    | Bias in selection of the reported result                                              | Overall result                                                                        |
|-------|-------------------------------|-------------------------------------------------------------------------------------|-------------------------------------------------------------------------------------|-------------------------------------------------------------------------------------|---------------------------------------------------------------------------------------|---------------------------------------------------------------------------------------|---------------------------------------------------------------------------------------|
|       |                               |                                                                                     |                                                                                     |                                                                                     |                                                                                       |                                                                                       |                                                                                       |
|       | Agustina R et al., 2013       |    |    |    |    |    |    |
|       | Axling U et al., 2020         |    |    |    |    |    |    |
|       | Ballini A et al., 2019        |   |   |   |   |   |   |
|       | Donaldson M S et al., 2000    |  |  |  |  |  |  |
|       | Fabian E and Elmadfa I., 2007 |  |  |  |  |  |  |
|       | Fabian E et al., 2008         |  |  |  |  |  |  |
|       | Mohammad A et al., 2006       |  |  |  |  |  |  |
|       | Surono I.S et al., 2014       |  |  |  |  |  |  |
|       | Valentini L et al., 2015      |  |  |  |  |  |  |
|       | *Gohel M et al., 2016         |  |  |  |  |  |  |
|       | *Narva M et al., 2004         |  |  |  |  |  |  |
