# Supplementary material for: Probiotic Supplementation and Micronutrient Status in Healthy Subjects: A Systematic Review of Clinical Trials
Source: MDPI journal article supplement (doi:10.3390/nu13093001), 2021-08-28
Supplement: s1 [file s1]

Table S1. Studies that assessed the effect of probiotic supplementation on micronutrient status in healthy subjects.

| Reference                 | Study Design | Population group                                                               | Intervention                                                             | Comparator                            | Dose                                                                                                                      | Format                 | Main Results                                                                                                                                                         |
|---------------------------|--------------|--------------------------------------------------------------------------------|--------------------------------------------------------------------------|---------------------------------------|---------------------------------------------------------------------------------------------------------------------------|------------------------|----------------------------------------------------------------------------------------------------------------------------------------------------------------------|
| Agustina et al. 2013 [46] | RDBPC        | 494 healthy children (aged 1–6 years, non-breastfed)                           | Intervention Group 1: regular calcium milk with <i>L. casei</i> 4311     | Placebo Group 1: low calcium milk     | 180 mL                                                                                                                    | Milk and coated straws | Significant decrease in Hb, Hct and serum ferritin in all groups from baseline but no significant difference between PROB and PC                                     |
|                           |              |                                                                                |                                                                          |                                       | Twice a day for 6 months                                                                                                  |                        |                                                                                                                                                                      |
|                           |              |                                                                                | Intervention Group 2: Regular calcium milk with <i>L. reuteri</i> 17,938 | Placebo Group 2: regular calcium milk | Group 1: <i>L. casei</i> 4311, 5 × 10 <sup>8</sup> CFU/d<br>Group 2: <i>L. reuteri</i> 17,938 , 5 × 10 <sup>8</sup> CFU/d |                        | Significant increase in sTfR in all groups from baseline but no significant difference between PROB and PC                                                           |
|                           |              |                                                                                |                                                                          |                                       |                                                                                                                           |                        | No significant changes in serum zinc                                                                                                                                 |
| Axling et al. 2021 [49]   | RDBPC        | 39 healthy non-anemic female athletes with low iron stores, (aged 16–40 years) | <i>L. plantarum</i> 299v                                                 | Placebo: capsule with no probiotic    | Daily one, for 12 weeks<br><i>L. plantarum</i> 299v, 10 <sup>10</sup> CFU/capsule                                         | Capsule                | Significant increase in plasma ferritin in both groups from baseline to 12 weeks but no significant difference between PROB and PC                                   |
|                           |              |                                                                                |                                                                          |                                       |                                                                                                                           |                        | Borderline significant difference in serum ferritin after 4 weeks between PROB and PC (p=0.056)                                                                      |
|                           |              |                                                                                |                                                                          |                                       |                                                                                                                           |                        | No significant results in mean reticulocyte hemoglobin, Hb, plasma iron, plasma transferrin, plasma transferrin saturation, EVF, blood reticulocytes, sTfR, hepcidin |

|                            |       |                                          |                                                                                                                                                                                                                                                                                |                                                        |                                                                                                                                                                   |         |                                                                                                                                                                                                                                                                                                                                                                          |
|----------------------------|-------|------------------------------------------|--------------------------------------------------------------------------------------------------------------------------------------------------------------------------------------------------------------------------------------------------------------------------------|--------------------------------------------------------|-------------------------------------------------------------------------------------------------------------------------------------------------------------------|---------|--------------------------------------------------------------------------------------------------------------------------------------------------------------------------------------------------------------------------------------------------------------------------------------------------------------------------------------------------------------------------|
| Ballini et al. 2019 [50]   | RDBCT | 40 children<br>(aged 14–18 years)        | <i>L. plantarum</i> , <i>L. acidophilus</i> , <i>B. infantis</i> , <i>B. Lactis</i> , combined with prebiotic fructo-oligosaccharides                                                                                                                                          | Placebo: tablet with no probiotic                      | Daily one for 10 weeks<br><i>L. plantarum</i> , <i>L. acidophilus</i> , <i>B. infantis</i> , <i>B. Lactis</i> , 45 × 10 <sup>9</sup> CFU                          | Tablet  | a<br>Increase in vitamin A in both groups from baseline<br><br>Vitamin D, calcium and zinc increased in synbiotic group but decreased in PC (p values not reported)                                                                                                                                                                                                      |
| Donaldson et al. 2000 [47] | RCT   | 24 vegan subjects<br>(aged 55 ± 9 years) | Group 2: 1 tablespoon of nutritional yeast daily<br>Group 3: Probiotic Formula ( <i>L. plantarum</i> , <i>L. salivarius</i> , <i>L. acidophilus</i> , <i>B. bifidus</i> and <i>Bacillus subtilis</i> )<br>Group 4: Flora Food ( <i>L. salivarius</i> and <i>L. plantarum</i> ) | Group1: sublingual cyanocobalamin with no probiotic    | Placebo: tablet<br>Twice a day for 3 months<br>Group1: 500 µg for 3 days a week<br>Group 2: ~5 µg cyanocobalamin<br>Group 3 and 4: no dosage information reported | Capsule | Significant decrease in MMA in groups 1 and 2 from baseline but no significant change in groups 3 and 4                                                                                                                                                                                                                                                                  |
| Elmadfa et al. 2001 [42]   | CT    | 12 healthy adults<br>(aged 25–36 years)  | <i>S. thermophilus</i> plus <i>L. acidophilus</i> and <i>L. casei (rhamnosus)</i> S GG (LGG)                                                                                                                                                                                   | Placebo:<br>Yogurt with thermally inactivated cultures | 500 g daily for one month<br><i>S. thermophilus</i> plus <i>L. acidophilus</i> and <i>L. casei (rhamnosus)</i> S GG (LGG), 5 × 10 <sup>7</sup> CFU/g              | Yogurt  | Blood plasma:<br>After the first two weeks:<br>Significant decrease in plasma thiamin from baseline<br>Significant increase in FAD from baseline<br>No significant change in FMN, free riboflavin or P-5-P<br><br>After the second two weeks:<br>Significant decrease in plasma thiamin and FAD from baseline<br>No significant changes in FMN, free riboflavin or P-5-P |

|                              |     |                                     |                                                                                                                                                                                                         |                                                                              |                                                                                                                                                                                                                                                                                                                                                                                                                                                                     |        |                                                                                                                                                                                                                                                                                                           |
|------------------------------|-----|-------------------------------------|---------------------------------------------------------------------------------------------------------------------------------------------------------------------------------------------------------|------------------------------------------------------------------------------|---------------------------------------------------------------------------------------------------------------------------------------------------------------------------------------------------------------------------------------------------------------------------------------------------------------------------------------------------------------------------------------------------------------------------------------------------------------------|--------|-----------------------------------------------------------------------------------------------------------------------------------------------------------------------------------------------------------------------------------------------------------------------------------------------------------|
|                              |     |                                     |                                                                                                                                                                                                         |                                                                              |                                                                                                                                                                                                                                                                                                                                                                                                                                                                     |        | Urine:<br>Significant decrease in pyridoxic acid<br>No significant changes in thiamin or B2 vitamers                                                                                                                                                                                                      |
|                              |     |                                     |                                                                                                                                                                                                         |                                                                              |                                                                                                                                                                                                                                                                                                                                                                                                                                                                     |        | Feces:<br>No significant changes in thiamin, B2 vitamers<br>or pyridoxical and pyridoxic acid                                                                                                                                                                                                             |
|                              |     |                                     |                                                                                                                                                                                                         |                                                                              | Daily for one month                                                                                                                                                                                                                                                                                                                                                                                                                                                 |        |                                                                                                                                                                                                                                                                                                           |
|                              |     |                                     | Intervention group: probiotic yogurt: <i>S. thermophilus</i> and <i>L. bulgaricus</i> , enriched with the probiotic culture <i>L. paracasei</i> (subsp. <i>Paracasei</i> ) ( <i>L. casei</i> DN-114 001 | Placebo: conventional Yogurt: <i>S. thermophilus</i> , <i>L. bulgaricus</i>  | First two weeks 100 g, second two weeks 200 g<br>intervention group: <i>S. thermophiles</i> , 2 × 10 <sup>8</sup> CFU/g and <i>L. bulgaricus</i> , 10 <sup>7</sup> CFU/g, enriched with the probiotic culture <i>L. paracasei</i> (subsp. <i>Paracasei</i> ) ( <i>L. casei</i> DN-114 001), 3.6 × 10 <sup>8</sup> CFU/g<br>Placebo: <i>S. thermophilus</i> , 3.9 × 10 <sup>7</sup> CFU/g, <i>L. bulgaricus</i> , 6.4 × 10 <sup>7</sup> CFU/g                        | Yogurt | During continued yogurt intake (T1-T3), in both groups<br><br>Significant decrease in vitamin E, lycopene, zeaxanthin in both groups from baseline<br><br>Significant decrease in lutein and β-carotene from baseline only in PROB                                                                        |
| Fabian and Elmadfa 2007 [43] | RCT | 32 healthy women (aged 22–29 years) |                                                                                                                                                                                                         |                                                                              |                                                                                                                                                                                                                                                                                                                                                                                                                                                                     |        |                                                                                                                                                                                                                                                                                                           |
|                              |     |                                     | Intervention group: probiotic yogurt, <i>S. thermophilus</i> + <i>L. bulgaricus</i> + <i>L. paracasei</i> (subsp. <i>Paracasei</i> ) + <i>L. casei</i> DN-114 001                                       | Placebo : conventional yogurt: <i>S. thermophiles</i> , <i>L. bulgaricus</i> | Daily for one month<br>First two weeks 100 g, second two weeks 200 g<br>intervention group: <i>S. thermophiles</i> , 2 × 10 <sup>8</sup> CFU/g and <i>L. bulgaricus</i> , 10 <sup>7</sup> CFU/g, enriched with the probiotic culture <i>L. paracasei</i> (subsp. <i>Paracasei</i> ) ( <i>L. casei</i> DN-114 001), 3.6 × 10 <sup>8</sup> CFU/g<br>Placebo: <i>S. thermophilus</i> , 3.9 × 10 <sup>7</sup> CFU/g, <i>L. bulgaricus</i> , 6.4 × 10 <sup>7</sup> CFU/g | Yogurt | Blood:<br>After first two weeks:<br>No significant change in thiamin and P-5-P in both groups from baseline<br>Significant decrease in FAD in both groups from baseline<br>Significant increase in FMN and free riboflavin in both groups from baseline<br><br>After the second two weeks in both groups: |
| Fabian et al. 2008 [44]      | RCT | 32 healthy women (aged 22-29 years) |                                                                                                                                                                                                         |                                                                              |                                                                                                                                                                                                                                                                                                                                                                                                                                                                     |        |                                                                                                                                                                                                                                                                                                           |

|                           |       |                                             |                                                                                          |                                           |                                                                                                                                                                                                    |         |  |                                                                                            |
|---------------------------|-------|---------------------------------------------|------------------------------------------------------------------------------------------|-------------------------------------------|----------------------------------------------------------------------------------------------------------------------------------------------------------------------------------------------------|---------|--|--------------------------------------------------------------------------------------------|
|                           |       |                                             |                                                                                          |                                           |                                                                                                                                                                                                    |         |  | Significant increase in thiamin, FMN and free riboflavin in both groups                    |
|                           |       |                                             |                                                                                          |                                           |                                                                                                                                                                                                    |         |  | Significant decrease in FAD in both groups                                                 |
|                           |       |                                             |                                                                                          |                                           |                                                                                                                                                                                                    |         |  | No significant changes in P-5-P in both groups                                             |
|                           |       |                                             |                                                                                          |                                           |                                                                                                                                                                                                    |         |  | Urine:                                                                                     |
|                           |       |                                             |                                                                                          |                                           |                                                                                                                                                                                                    |         |  | No significant changes in thiamin, riboflavin, α-EGR, pyridoxic acid and α- EGOT           |
| Gohel et al. 2016 [48]    | RDBPC | 59 healthy older people, (aged 64-74 years) | Fermented milk with <i>L. helveticus</i> MTCC 5463 and <i>S. thermophilus</i> MTCC 5460. | Placebo: fermented milk without probiotic | 200 mL/day, 4 week intake, 4 week washout, crossover, 4 week intake and 4 week washout<br><br>At least 10 <sup>8</sup> CFU/mL of viable <i>L. helveticus</i> and <i>S. thermophilus</i> MTCC 5460. | Milk    |  | Significant increase in serum calcium in PROB and significant decrease in PC from baseline |
|                           |       |                                             |                                                                                          |                                           |                                                                                                                                                                                                    |         |  | Significant increase in Hct from baseline only in PROB                                     |
|                           |       |                                             |                                                                                          |                                           |                                                                                                                                                                                                    |         |  | No significant change in Hb                                                                |
| Korčok et al. 2018 [52]   | CT    | 20 healthy females, (aged 20 - 40 years)    | <i>L. plantarum</i> 299v                                                                 | Placebo: capsule with no probiotic        | Daily one, for 7 days<br><br><i>L. plantarum</i> 299v, 1.1 × 10 <sup>9</sup> CFU                                                                                                                   | Capsule |  | a                                                                                          |
|                           |       |                                             |                                                                                          |                                           |                                                                                                                                                                                                    |         |  | An improvement in iron status in PROB compared to PC                                       |
|                           |       |                                             |                                                                                          |                                           |                                                                                                                                                                                                    |         |  | No change in ferritin, TIBC and Hb (p values not reported)                                 |
| Mohammad et al. 2006 [51] | RCT   | 24 healthy children, (aged 11 years)        | <i>L. acidophilus</i> (La1)                                                              | Placebo: yogurt without probiotic         | 2 cups yogurt daily for 42 days<br><br><i>L. acidophilus</i> (La1), 5 x 10 <sup>9</sup> CFU                                                                                                        | Yogurt  |  | Blood:                                                                                     |
|                           |       |                                             |                                                                                          |                                           |                                                                                                                                                                                                    |         |  | Significant increase in vitamin B12, folate only in PROB from baseline                     |
|                           |       |                                             |                                                                                          |                                           |                                                                                                                                                                                                    |         |  | Significant decrease in t-Hcy only in PROB from baseline                                   |
|                           |       |                                             |                                                                                          |                                           |                                                                                                                                                                                                    |         |  | Urine:                                                                                     |

|                            |        |                                                    |                                                                                                                                                                                                                                                 |                                                                                                                               |                                                                                                                                                              |          |                                                                                                                                                                                                                                                                                                                          |
|----------------------------|--------|----------------------------------------------------|-------------------------------------------------------------------------------------------------------------------------------------------------------------------------------------------------------------------------------------------------|-------------------------------------------------------------------------------------------------------------------------------|--------------------------------------------------------------------------------------------------------------------------------------------------------------|----------|--------------------------------------------------------------------------------------------------------------------------------------------------------------------------------------------------------------------------------------------------------------------------------------------------------------------------|
|                            |        |                                                    |                                                                                                                                                                                                                                                 |                                                                                                                               |                                                                                                                                                              |          | Significant decrease in MMA and t-Hcy only in PROB compared to baseline                                                                                                                                                                                                                                                  |
| Narva et al. 2004 [16]     | RDBPC  | 20 healthy postmenopausal women (aged 50-78 years) | Fermented milk with <i>L. helveticus</i> LBK-16H bacteria and peptide concentrations of 14.5 mg/100 g of IPP and VPP together                                                                                                                   | Control milk fermented with <i>Lactococcus</i> sp. mixed culture                                                              | 220 mL <i>L.helveticus</i> milk, and 420 mL control milk, One day intake, 6 days washout, crossover, one day intake no probiotic dosage information reported | Milk     | Significant improvement in serum calcium in PROB compared to PC<br><br>No significant result in serum ionised calcium, phosphate and urinary calcium                                                                                                                                                                     |
| Silva et al. 2008 [28]     | CT     | 109 children, (aged 2-5 years)                     | Probiotic group: same as placebo group + <i>L. acidophilus</i>                                                                                                                                                                                  | Placebo: whole milk with <i>S.thermophilus</i> + <i>L. bulgaricus</i> (0.8), culture of probiotic <i>L. acidophilus</i> (1.2) | 80 mL daily for 101 days<br><i>L. acidophilus</i> 10 <sup>8</sup> CFU/mL                                                                                     | Milk     | Significant decrease in serum ferritin in PROB, and significant increase in PC from baseline<br>Significant decrease in Hb in both groups but no significant difference between PROB and PC<br>Significant decrease in Hct in both groups from baseline<br>Significant decrease in serum iron from baseline only in PROB |
| Surono et al. 2014 [45]    | RDBPCT | 45 healthy infants (aged 12-24 months)             | Group 1: probiotic <i>L. plantarum</i> IS-10506,<br>Group 2: combination of probiotic and zinc                                                                                                                                                  | Group 3: zinc<br>Group 4: placebo                                                                                             | Daily for 90 days<br>Group 1: <i>L. plantarum</i> IS-10506, 2.3 × 10 <sup>10</sup> CFUs/g powder<br>Group 3: 20 mg zinc sulfate monohydrate                  | Powder   | Significant improvement in serum zinc in groups 2 and 3 from baseline<br><br>Significant increase in serum zinc in group 2 compared to PC                                                                                                                                                                                |
| Valentini et al. 2015 [32] | RCT    | 62 healthy older people, (aged 65- 85 years)       | Web-based dietary advice (RISTOMED platform) with supplementation of VSL#3 consisting of the following strains: <i>B. infantis</i> DSM 24737, <i>B. longum</i> DSM 24736, <i>B. breve</i> DSM 24732, <i>L. acidophilus</i> DSM 24735, <i>L.</i> | Web-based dietary advice (RISTOMED platform) alone                                                                            | Twice a day for 8 weeks<br>112 billion lyophilized bacteria                                                                                                  | Capsules | Significant improvement in vitamin B12, folate in PROB from baseline<br><br>Significant decrease in Hcy in PROB from baseline                                                                                                                                                                                            |

---

*delbrückii* ssp. *bulgaricus* DSM  
24734, *L. paracasei* DSM 24733, *L.*  
*plantarum* DSM 24730, and *S.*  
*thermophilus* DSM 24731, in  
defined ratio)

---

<sup>a</sup>, signifies that p value or level of significance not reported; RDBPC, randomized double blind placebo control; RCT, randomized control trial; CT, clinical trial; PROB, probiotic; PC, placebo; Hb: hemoglobin; Hct: hematocrit; sTfR: soluble transferrin receptor; TIBC: Total iron binding capacity; FAD: Flavin adenine dinucleotide; FMN: Flavin mononucleotide; P-5-P: *pyridoxal 5'-phosphate*; EVF: Erythrocyte volume fraction; Hcy: Homocysteine; MMA: methylmalonic acid;  $\alpha$ -EGR: erythrocyte glutathione reductase;  $\alpha$ - EGOT; erythrocyte glutamate oxaloacetate transaminase.
